# Supplementary material for: C–H bond activation and S-atom transfer from cobalt(iii) thiolate and isothiocyanate complexes
Source: Royal Society of Chemistry journal article supplement (doi:10.1039/c4dt01823k), 2014-08-21
Supplement: c4dt01823k1.pdf [file c4dt01823k1.pdf]

## C-H Bond Activation and S-atom Transfer from Cobalt(III) Thiolate and Isothiocyanate Complexes

Hongwei Xu, Paul G. Williard and Wesley H. Bernskoetter \*

*Department of Chemistry, Brown University, Providence, RI 02912*

*-SUPPLEMENTARY INFORMATION-*

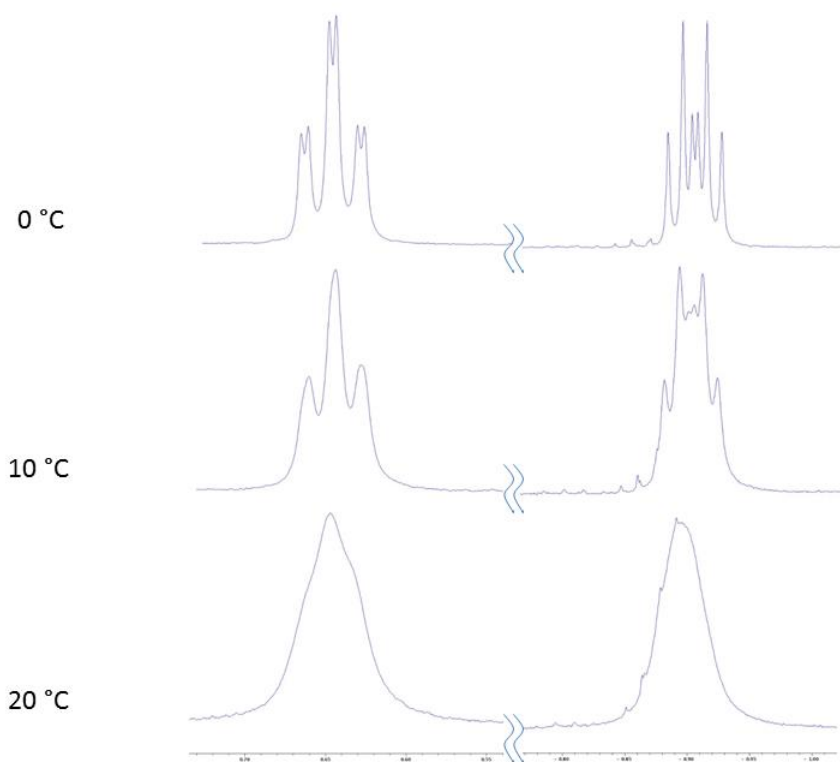

**Figure S1.** <sup>1</sup>H NMR spectrum of cobalt-methyl resonances of complex **2** (in *Tol-d*<sub>8</sub>) at various temperatures.
